# Supplementary material for: Novel Aurora A Kinase Inhibitor Fangchinoline Enhances Cisplatin–DNA Adducts and Cisplatin Therapeutic Efficacy in OVCAR-3 Ovarian Cancer Cells-Derived Xenograft Model
Source: MDPI journal article supplement (doi:10.3390/ijms23031868), 2022-02-07
Supplement: s1 [file s1]

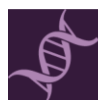

## Supplementary results

Table S1. The list of the goldscore of the 12 compounds.

| No. | Name                          | Goldscore |
|-----|-------------------------------|-----------|
| 1   | Amentoflavone                 | 58.41     |
| 2   | Fangchinoline                 | 57.19     |
| 3   | Palmitine hydrochloride       | 54.95     |
| 4   | Sennoside B                   | 53.58     |
| 5   | Docetaxel                     | 53.09     |
| 6   | Bisdemethoxycurcumin          | 51.02     |
| 7   | (+)-Bicuculline               | 50.89     |
| 8   | Protopine                     | 50.89     |
| 9   | Isoliquiritigenin             | 50.49     |
| 10  | Emodin                        | 50.03     |
| 11  | Berberine                     | 49.68     |
| 12  | Cephalomannine                | 49.66     |
| 13  | Aurora A ligand (PDB ID: A4W) | 49.03     |

Table S2. The IC<sub>50</sub> of the 12 compounds on ovarian cancer cell lines viability.

| Compounds               | IC <sub>50</sub> (μM) |            |             |            |
|-------------------------|-----------------------|------------|-------------|------------|
|                         | MDH2774               | ES2        | OVCAR3      | SKOV3      |
| Amentoflavone           | 99.32±0.03            | -          | -           | 78.87±0.80 |
| Fangchinoline           | 8.71±0.24             | 25.10±0.65 | 9.66±0.30   | 11.74±1.20 |
| Palmitine hydrochloride | 51.29±0.34            | -          | -           | 59.33±0.02 |
| Sennoside B             | -                     | -          | -           | 119.9±0.02 |
| Docetaxel               | 24.55±0.011           | 50.38±0.25 | 40.59±0.015 | 21.48±0.01 |
| Bisdemethoxycurcumin    | 25.97±0.53            | 45.47±0.50 | 24.95±0.74  | 25.14±1.90 |
| (+)-Bicuculline         | -                     | -          | -           | -          |
| Protopine               | -                     | -          | 25.44±0.68  | 26.12±0.49 |
| Isoliquiritigenin       | 50.36±0.48            | 51.46±0.32 | 25.79±1.21  | 25.98±0.44 |
| Emodin                  | 34.32±0.021           | 50.23±2.09 | 22.64±0.030 | 34.7±0.02  |
| Berberine               | 12.78±1.24            | 87.6±0.02  | 20.56±0.021 | 39.38±0.02 |
| Cephalomannine          | 41.72±0.01            | -          | 41.78±0.013 | 10.79±0.01 |

IC<sub>50</sub>: half maximal inhibitory concentration.

Data are presented as the mean ± SD (standard deviation).
